# Supplementary material for: Selective and Effective Gold Recovery from Printed Circuit Boards and Gold Slag Using Amino-Acid-Functionalized Cellulose Microspheres
Source: MDPI journal article supplement (doi:10.3390/polym15020321), 2023-01-08
Supplement: s1 [file s1]

Supplementary material for

**Selective and Effective Gold Recovery from Printed Circuit Boards  
and Gold Slag by Amino Acid Functionalized Cellulose Microspheres**

*Fulai Hao<sup>1,3</sup>, Jifu Du<sup>2\*</sup>, Lifang Peng<sup>4</sup>, Manman Zhang<sup>4</sup>,*

*Zhen Dong<sup>4</sup>, Yanbai Shen<sup>1\*</sup>, Long Zhao<sup>4\*</sup>*

<sup>1</sup>School of Resources and Civil Engineering, Northeastern University, Shenyang 110819, China

<sup>2</sup>School of Nuclear Technology and Chemistry & Biology, Hubei University of Science and Technology, Xianning 437100, China

<sup>3</sup>Changchun Gold Research Institute, China National Gold Group Co. Ltd, Changchun 130000, China

<sup>4</sup>State Key Laboratory of Advanced Electromagnetic Engineering and Technology, School of Electrical and Electronic Engineering, Huazhong University of Science and Technology, Wuhan 430074, China.

\*Correspondence: [duzidedu@163.com](mailto:duzidedu@163.com) (Jifu Du); [shenyanbai@mail.neu.edu.cn](mailto:shenyanbai@mail.neu.edu.cn) (Yanbai Shen); [zhaolong@hust.edu.cn](mailto:zhaolong@hust.edu.cn) (Long Zhao)

Correspondence: author at: State Key Laboratory of Advanced Electromagnetic Engineering and Technology, School of Electrical and Electronic Engineering, Huazhong University of Science and Technology, Wuhan 430074, China

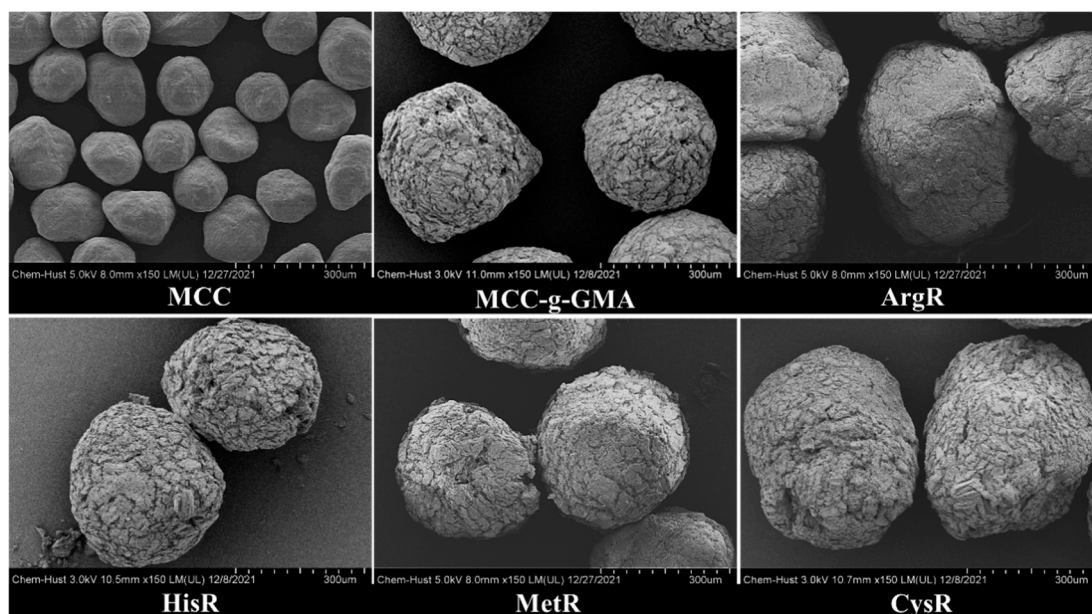

Figure S1 SEM images of MCC, MCC-g-GMA and the amino acid resins

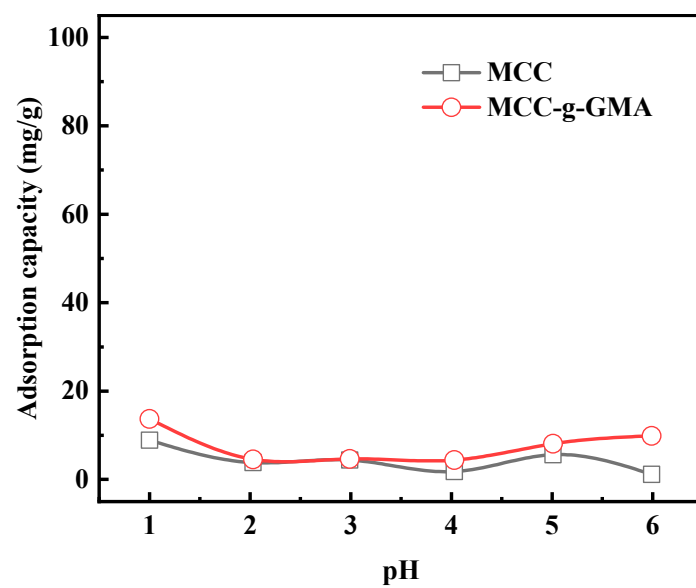

Figure S2 Effect of pH on Au (III) adsorption by MCC and MCC-g-GMA. ( $C_0=100$  mg/L, adsorbent mass=10 mg, volume=10 mL,  $T=30$  °C).

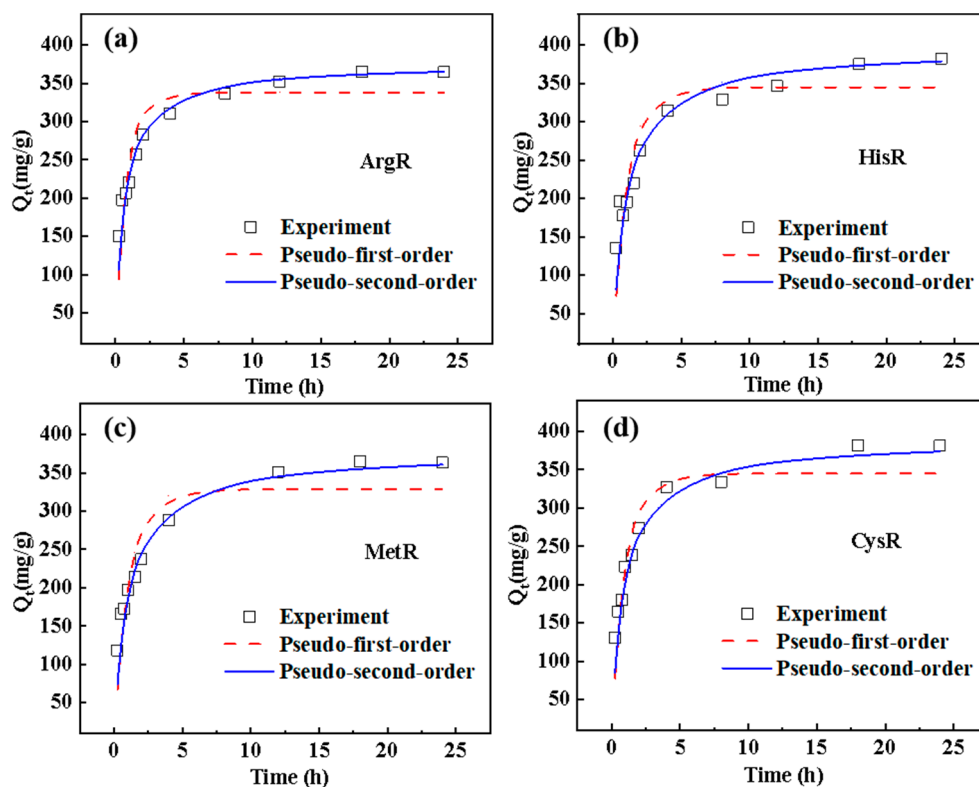

Figure S3 The adsorption kinetics of amino acid resins for Au(III) ions. ( $C_0=400$  mg/L, adsorbent mass=10 mg, volume=10 mL, pH=2,  $T=30$  °C).

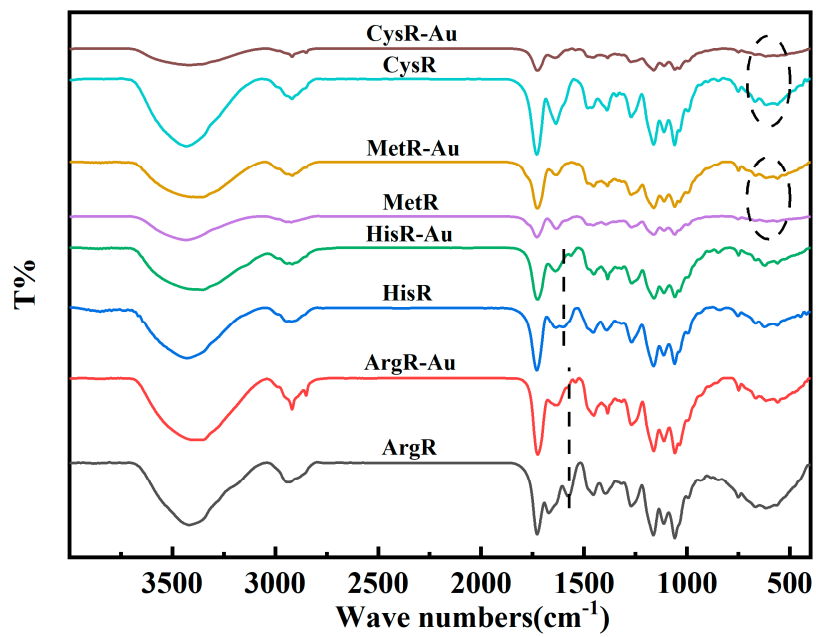

Figure S4 FTIR spectra of ArgR, HisR, MetR and CysR before and after the adsorption of Au(III)

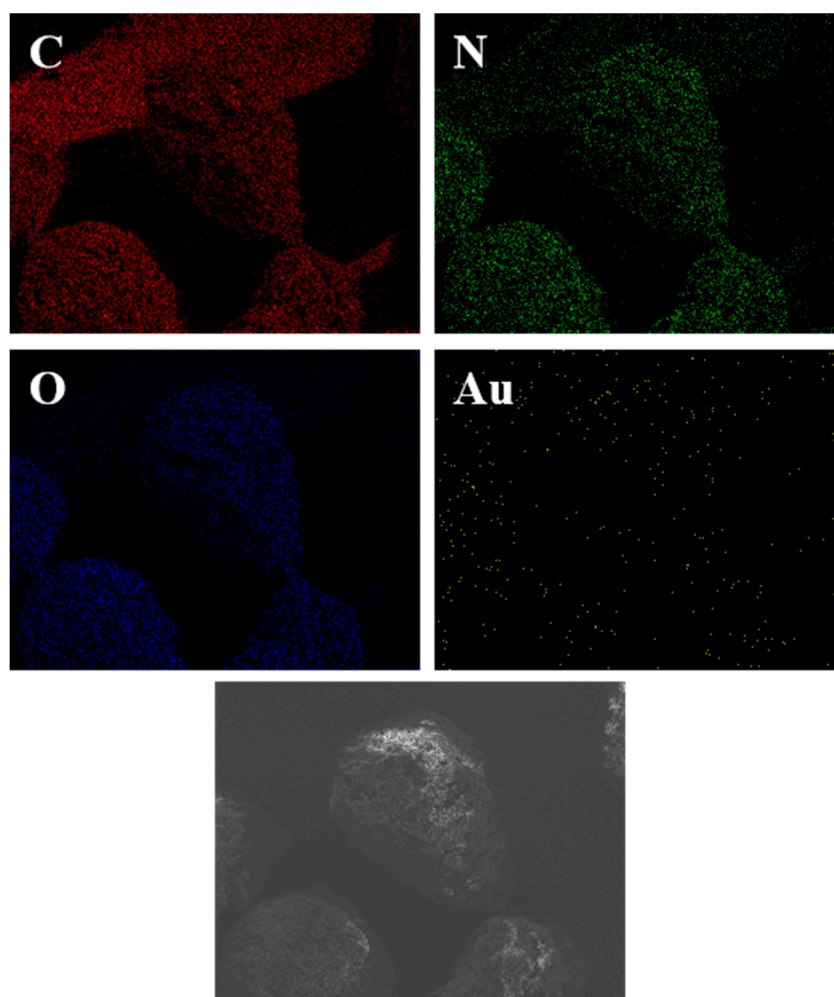

Figure S5 EDX images of ArgR after Au (III) adsorption

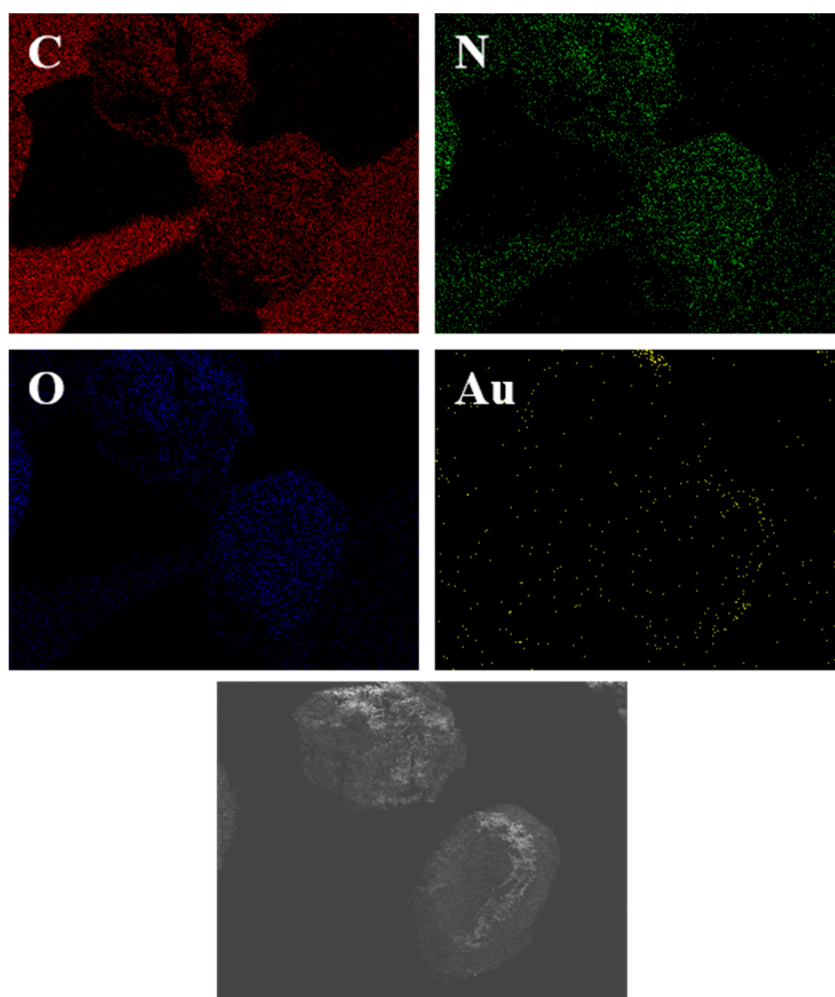

Figure S6 EDX images of HisR after Au (III) adsorption

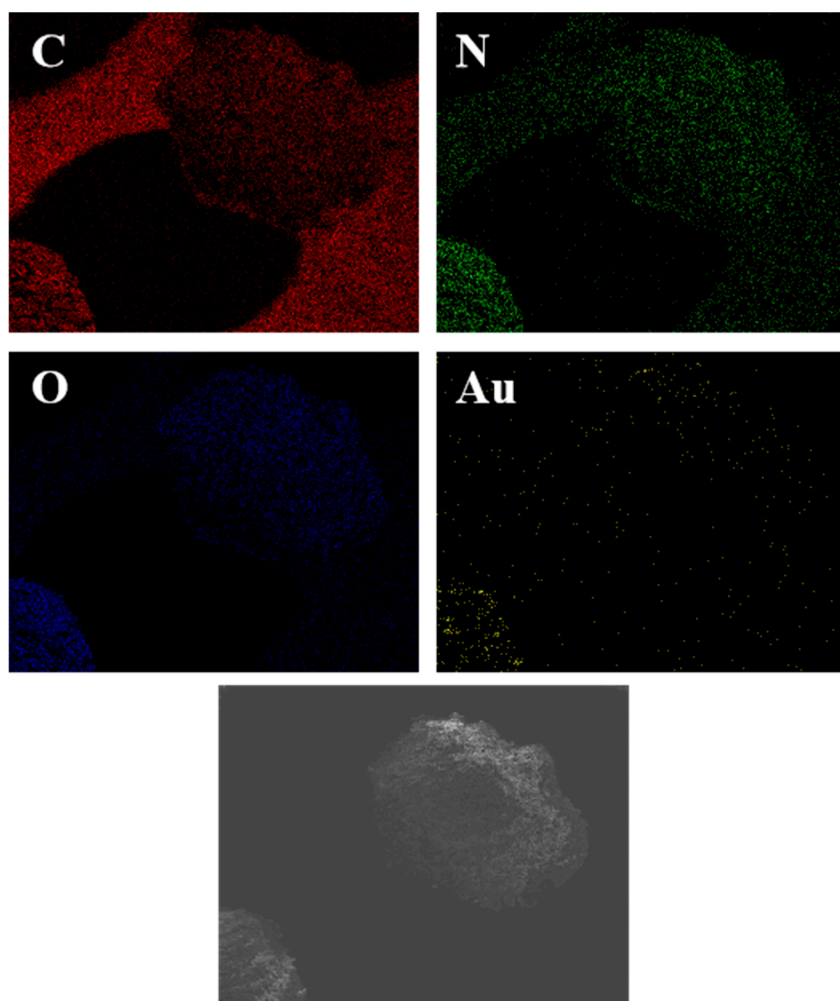

Figure S7 EDX images of MetR after Au (III) adsorption



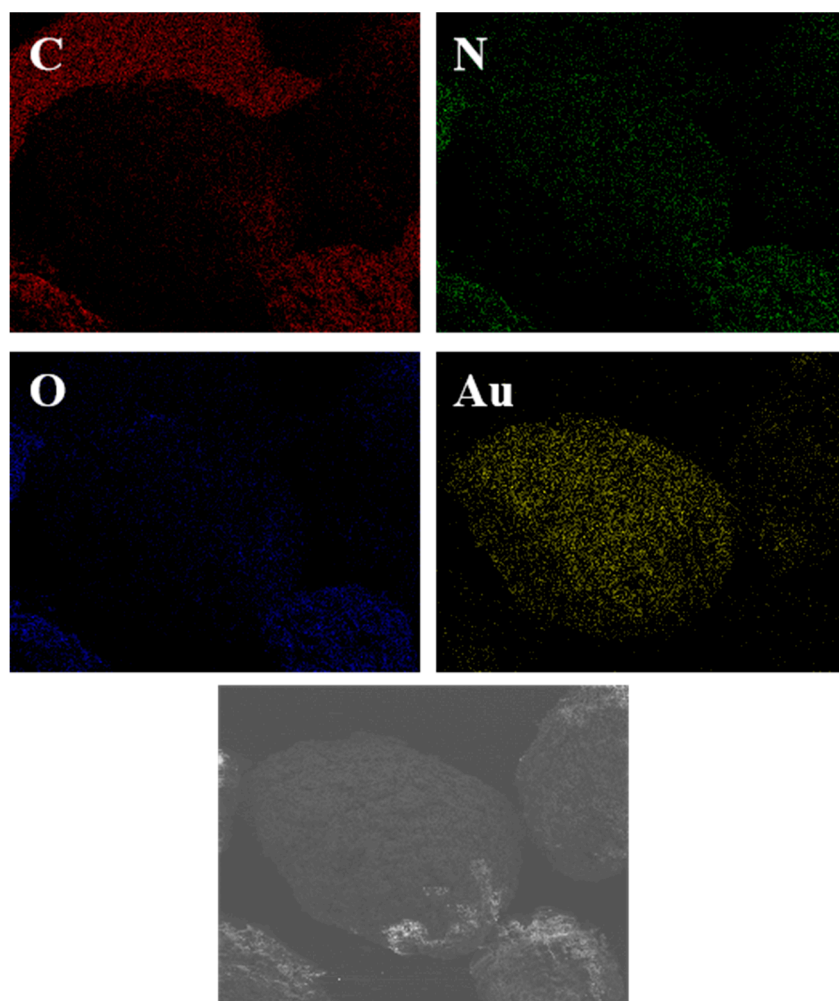

Figure S8 EDX images of CysR after Au (III) adsorption

**Table S1** BET surface areas of MCC, MCC-g-GMA and the amino acid resins.

| Material  | BET surface (m <sup>2</sup> /g) |
|-----------|---------------------------------|
| MCC       | 0.4908                          |
| MCC-g-GMA | 1.0144                          |
| ArgR      | 1.0482                          |
| HisR      | 1.8206                          |
| MetR      | 1.7532                          |
| CysR      | 1.0548                          |

**Table S2** Kinetic parameters and correlation coefficients ( $R^2$ ) of the amino acid resins. ( $C_0=400$  mg/L, adsorbent mass=10 mg, volume=10 mL, pH=2, T=30 °C)

| Adsorbent   | Pseudo-first-order |             |        | Pseudo- second-order  |             |        |
|-------------|--------------------|-------------|--------|-----------------------|-------------|--------|
|             | $k_1(h^{-1})$      | $Q_e(mg/g)$ | $R^2$  | $k_2(g/(mg \cdot h))$ | $Q_e(mg/g)$ | $R^2$  |
| <b>ArgR</b> | 1.2979             | 337.8255    | 0.8356 | 0.0042                | 374.5318    | 0.9996 |
| <b>HisR</b> | 0.9543             | 344.8416    | 0.8083 | 0.0026                | 393.7008    | 0.9976 |
| <b>MetR</b> | 0.9187             | 328.5267    | 0.8092 | 0.0026                | 375.9398    | 0.9965 |
| <b>CysR</b> | 1.0212             | 345.0596    | 0.8846 | 0.0029                | 387.5969    | 0.9944 |
